# Supplementary material
Source: publisher figshare collection journal article supplement (https://acs.figshare.com/ndownloader/files/21732120)
Supplement: Supplementary file 1 [file 21732120]

## **Supporting Information**

# **Bacterial Detection and Elimination Using a Dual-Functional Porphyrin-Based Porous Organic Polymer with Peroxidase-Like and High Near-Infrared-Light-Enhanced Antibacterial Activity**

Dekang Li,<sup>a</sup> Yishan Fang,<sup>b</sup> and Xiaomei Zhang<sup>\*a</sup>

<sup>a</sup> School of Chemistry and Chemical Engineering, Shandong University, Jinan, Shandong 250100, China

<sup>b</sup> School of Food Science and Engineering, Qilu University of Technology, Shandong Academy of Sciences, Jinan 250353, China

### **Corresponding Author**

\* E-mail: zhangxiaomei@sdu.edu.cn (X. Zhang)

**S1. Instrumentation and Methods.** Fourier transform infrared spectra (FT-IR) were obtained in KBr pellets with  $2\text{ cm}^{-1}$  resolution on an ALPHA-T spectrometer (Bruker, Germany). Solid-state  $^{13}\text{C}$  CP/MAS NMR experiments were performed on a Bruker AVANCE III 600 (Germany) spectrometer using a 4 mm MAS probe and a spinning rate of 12 kHz. The Hitachi S-4800 (Japan) scanning electron microscopy (SEM) was used to obtain SEM images. The UV-vis diffuse reflectance spectra were characterized by a Shimadzu UV-3600 UV-vis-near-IR spectrophotometer (Shimadzu Co., Japan). To prevent charging effects and improve image clarity, Au (1-2 nm) was sputtered onto the grids.  $\text{N}_2$  adsorption-desorption (Tristar II 3020, Micromeritics, USA) was measured at 77.3 K and the surface area of  $\text{FePPOP}_{\text{BPBF}}$  was calculated by both the Brunauer-Emmett-Teller (BET) and Langmuir methods. Thermogravimetric measurements were performed on a Mettler Toledo TGA/SDTA 851° under  $\text{N}_2$  (heated to  $600\text{ }^\circ\text{C}$ ,  $10\text{ }^\circ\text{C}\cdot\text{min}^{-1}$ ). Elemental analyses were performed by Vavio E1 III (Elementar, Germany). The Fe and Au contents of the PPOPs samples were detected by inductively coupled plasma atomic emission spectroscopic (ICP-AES) analysis with an IRIS Intrepid II XRP instrument. The colorimetric immunoassay measurements were carried out on EnSpire multimode plate readers (PerkinElmer). The photothermal study was done by using a 808 nm continuous-wave semiconductor laser (FC-808-2000-MM). Photothermal effects were measured by a mini dual temperature thermometer (UT320A) and the temperature change was recorded once per 20 s.

**S2. Preparation of FePPOP<sub>BFPB</sub> and Au@FePPOP<sub>BFPB</sub>.** FePPOP<sub>BFPB</sub> was synthesized through a simple hydrothermal strategy. Freshly distilled pyrrole (10  $\mu$ L, 0.12 mmol) and BFPP (100 mg, 0.18 mmol), FeCl<sub>3</sub>·6H<sub>2</sub>O (21.9 mg, 0.081 mmol) were dispersed in 100 mL propionic acid and the reaction system was stirred under N<sub>2</sub> at 25 °C for 4 h. Then the solution was transferred into a tetrafluoroethylene-lined autoclave and heated at 180 °C for 72 h. After cooling to room temperature, the dark brown precipitate was filtered and the precipitate was repeatedly washed with DMF, ultrapure water, and methanol until the filtrate became colorless. Finally, the resultant FePPOP<sub>BFPB</sub> nanoparticles were dried in a vacuum at 80 °C for 24 h. FePPOP<sub>BFPB</sub> was obtained as a brown powder with a yield of 60 %. The Elemental analysis value obtained by combustion was C, 68.21 %; H, 4.881 %; N, 5.4 %. The calculated theoretical formula of FePPOP<sub>BFPB</sub> was C, 71.14 %; H, 5.37 %; N, 10.29 %. ICP-AES analysis showed that the Fe content was 0.386 %.

To facilitate the conjugation of the bs-4582R with FePPOP<sub>BFPB</sub>, a small amount of Au was photodeposited on the surface of FePPOP<sub>BFPB</sub>. Briefly, 30.5 mg of FePPOP<sub>BFPB</sub> and NaOH (0.2 M, 1 mL) were mixed with 20 mL ethanol. After sonication for 3 minutes, 2 mL HAuCl<sub>4</sub> (0.8 wt %) was slowly added to the solution. Then, the mixture was irradiated with a 500 W xenon lamp, and stirred for 12 h until the solution turned reddish-brown. The precipitate was washed with water and ethanol at least three times to remove free nanoparticles for further investigation. After vacuum drying at 80 °C for 24 h, 37.7 mg of Au@FePPOP<sub>BFPB</sub> was obtained as a brown powder. ICP-AES analysis showed that the Fe and Au contents were 0.34 % and 5.35 %, respectively.

**S3. Peroxidase Activity Measurements, Stability Test and Kinetic Analysis of FePPOP<sub>BFPB</sub>.** The catalytic activity experiments were done by monitoring the absorbance change of peroxidase-like FePPOP<sub>BFPB</sub> with 3,3',5,5'-tetramethylbenzidine (TMB) at 25 °C for 3 min. The final concentrations of H<sub>2</sub>O<sub>2</sub>, TMB, and FePPOP<sub>BFPB</sub> were 40 mM, 0.1 mM, and 10 µg·mL<sup>-1</sup>, respectively. The buffer solution (pH=3.8) contained NaOAc and HOAc. To obtain optimum conditions for catalytic activity, the pH values (1.70-11.10), temperature (5-65 °C), and H<sub>2</sub>O<sub>2</sub> concentrations (0.5-80 mM) were carried out under the same conditions. In addition, five cycle tests was used to verify the stability of FePPOP<sub>BFPB</sub>. The other experimental conditions were same as the peroxidase activity measurements. The kinetic analyses were measured by using FePPOP<sub>BFPB</sub> (10 µg·mL<sup>-1</sup>) with (i) a fixed amount of H<sub>2</sub>O<sub>2</sub> (40 mM) and different amounts of TMB (0-0.2 mM) solution, and (ii) a fixed amount of TMB (0.1 mM) and different amounts of H<sub>2</sub>O<sub>2</sub> (0-30 mM). All reactions were monitored by measuring the absorbance at 652 nm using a Hitachi U-400 UV-vis spectrophotometer.

**S4. Preparation of Ab<sub>2</sub>@Au@FePPOP<sub>BFPB</sub>.** The Ab<sub>2</sub>@Au@FePPOP<sub>BFPB</sub> was prepared via the bioconjugation of Au@FePPOP<sub>BFPB</sub> with bs-4582R antibody, denoted as Ab<sub>2</sub> according to the previous literature. In detail, 10 mg of the Au@FePPOP<sub>BFPB</sub> hybrid were dispersed in 9 mL of PBS (0.01 M, pH=7.4) with Ab<sub>2</sub> (25 µg/mL, 2 mL) and ultrasonically vibrated for 15 s. The resulting solution was incubated at 4 °C with slight shaking for 24 h. During this process, Ab<sub>2</sub> were covalently conjugated with Au@FePPOP<sub>BFPB</sub> on the basis of the interaction between cysteine/NH<sub>3</sub><sup>+</sup>-lysine residues of the Ab<sub>2</sub> and Au.<sup>1</sup> Then, the BSA blocking buffer (5 wt %, 5 mL, diluted in

PBS, pH=7.40) was added and incubated at 4 °C for 12 h to block the possible residual sites on Au@FePPOP<sub>BFPB</sub>. After being purified and collected by centrifuging, the resulting Ab<sub>2</sub>@Au@FePPOP<sub>BFPB</sub> conjugates were dispersed in 9 mL of PBS and stored at 4 °C for further use.

### Confirming the Bioconjugation of Antibodies to Au@FePPOP<sub>BFPB</sub>

As can be seen in Figure S1, two characteristic peaks at 1672 and 1533 cm<sup>-1</sup> were observed in the FT-IR spectra of pure antibody (bs-4582R, Ab<sub>2</sub>) (curve 'a'), which corresponded to the amide I and II groups of Ab<sub>2</sub> proteins. When Ab<sub>2</sub> were immobilized onto the Au@FePPOP<sub>BFPB</sub>, the absorption bands for amide I and amide II could also be obviously observed (curve 'b'). These results revealed that Ab<sub>2</sub> could be conjugated onto the Au@FePPOP<sub>BFPB</sub> through the formation of the Au-S bond or Au-NH bond due to the interaction between cysteine or NH<sub>3</sub><sup>+</sup>-lysine residues of Ab<sub>2</sub> and the Au@FePPOP<sub>BFPB</sub>.

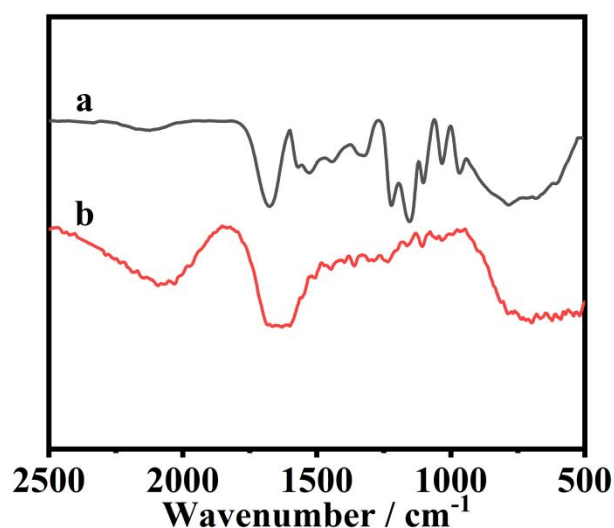

**Figure S1.** FT-IR spectra of (a) antibody (bs-4582R, Ab<sub>2</sub>) and (b) Ab<sub>2</sub>@Au@FePPOP<sub>BFPB</sub>.

### Calculating the Conjugation Amount and the Conjugation Efficiency of Antibody (bs-4582R, Ab<sub>2</sub>) to Au@FePPOP<sub>BFPB</sub>

To calculate the conjugation amount and the conjugation efficiency of antibody (bs-4582R, Ab<sub>2</sub>) to Au@FePPOP<sub>BFPB</sub>, the standard concentration curve of antibodies was monitored, firstly, Figure S2.

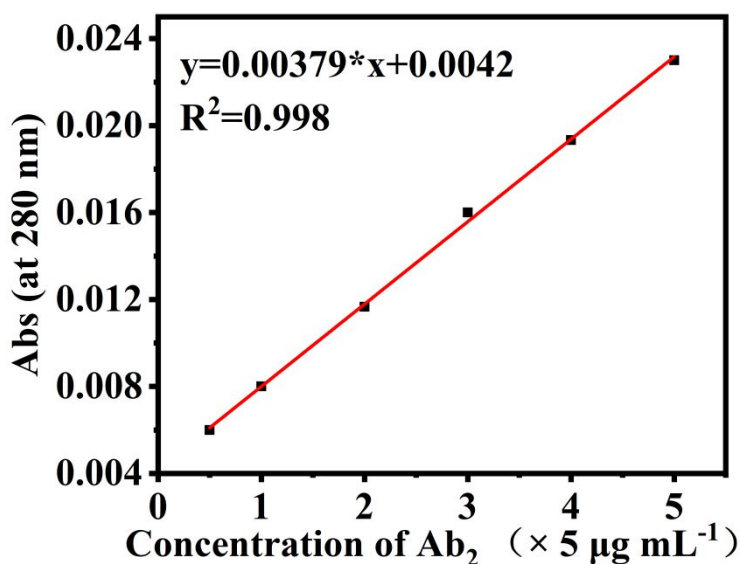

**Figure S2.** The standard concentration curve of antibody (bs-4582R, Ab<sub>2</sub>).

Then, 10 mg of the Au@FePPOP<sub>BFPB</sub> hybrid were dispersed in 9 mL of PBS (0.01 M, pH=7.4) with Ab<sub>2</sub> (25 μg/mL, 2 mL) and ultrasonically vibrated for 15 s. The resulting solution was incubated at 4 °C with slight shaking for 24 h. Then, Ab<sub>2</sub>@Au@FePPOP<sub>BFPB</sub> was separated by centrifuging. The amount of Ab<sub>2</sub> loaded on Au@FePPOP<sub>BFPB</sub> (Q<sub>e</sub>, μg mg<sup>-1</sup>) can be calculated by the concentration change of Ab<sub>2</sub> solution as monitored by the UV-Vis spectroscopy by using the Eq. 1.

$$Q_e = \frac{(C_0 - C_e)V}{m} \quad (\text{Eq. 1})$$

where  $C_0$  and  $C_e$  ( $\mu\text{g mL}^{-1}$ ) are the initial and final concentrations of  $\text{Ab}_2$ , respectively,  $V$  (mL) is the volume of the  $\text{Ab}_2$  solution, and  $m$  (mg) is the weight of  $\text{Au@FePPOP}_{\text{BFPB}}$ . The conjugation efficiency of antibody (bs-4582R,  $\text{Ab}_2$ ) to  $\text{Au@FePPOP}_{\text{BFPB}}$  can be calculated by the following:

$$\eta = \frac{C_0 - C_e}{C_0} \times 100 \% \quad (\text{Eq. 2})$$

The specific calculation process is as follows:

$$\begin{aligned} C_e &= \frac{0.0056 - 0.0042}{0.00379} \times 5 \mu\text{g mL}^{-1} = 1.85 \mu\text{g mL}^{-1} \\ Q_e &= \frac{(4.545 - 1.85) \times 11}{10} = 2.965 \mu\text{g mg}^{-1} \\ \eta &= \frac{4.545 - 1.85}{4.545} \times 100 \% = 59.3\% \end{aligned}$$

The result indicated that the conjugation amount and the conjugation efficiency of antibody (bs-4582R,  $\text{Ab}_2$ ) to  $\text{Au@FePPOP}_{\text{BFPB}}$  was  $2.965 \mu\text{g mL}^{-1}$  and 59.3 % respectively.

#### **S5. Calculation of the Photothermal Conversion Efficiency ( $\eta$ ) of $\text{FePPOP}_{\text{BFPB}}$ .**

Photothermal properties of the  $\text{FePPOP}_{\text{BFPB}}$  were measured according to the previous reports. The photothermal conversion efficiency ( $\eta$ ) was calculated as follows: 1 mL of the  $\text{FePPOP}_{\text{BFPB}}$  aqueous dispersion of different concentrations (0, 62.5, 125, 250, 500 and 1000 ppm) were exposed to 808 nm NIR laser for 850 s, and then the laser was shut off to let the solution cool to room temperature. Photothermal effects were measured by a mini dual temperature thermometer (UT320A). Then, the  $\eta$  value was calculated according to Eq. 3.

$$\eta = \frac{hA(T_{\text{max}} - T_{\text{amb}}) - Q_0}{I(1 - 10^{-A_\lambda})} \quad (\text{Eq. 3})$$

Here,  $h$  is the heat transfer coefficient,  $A$  is the surface area of the container,  $T_{\max}$  is the maximum system temperature,  $T_{\text{amb}}$  is the ambient surrounding temperature.  $Q_0$  is the baseline energy input by the solvent and sample container without the FePPOP<sub>BFPB</sub>.  $I$  is the laser power and  $A_\lambda$  is the absorbance at 808 nm. The lumped value of  $hA$  was determined by measuring the drop rate of temperature after removing the light source and the value of  $hA$  is derived according to Equations 4 and 5.

$$\tau_s = \frac{m_D - C_D}{hA} \quad (\text{Eq. 4})$$

$$\theta = \frac{T_{\text{amb}} - T}{T_{\text{amb}} - T_{\max}} \quad (\text{Eq. 5})$$

where  $\tau_s$  is the sample system time constant,  $m_D$  and  $C_D$  are the mass (1 g) and heat capacity (4.2 J g<sup>-1</sup> K<sup>-1</sup>) of deionized water used as solvent, respectively. The time constant was  $\tau_s = 319.67$  s based on the linear fit from the cooling period after 850 s vs.  $-\ln\theta$  as shown in Figure S2D. The heat energy ( $Q_0$ ) of the sample container and solvent without FePPOP<sub>BFPB</sub> was measured independently using Eq. 6.

$$Q_0 = (hA)'(T_{\max} - T_{\text{amb}}) \quad (\text{Eq. 6})$$

Accordingly, the photothermal conversion efficiency calculated by Eq. 1-4 was  $\eta = 35.6\%$ .

#### **S6. Recycling Experiments of FePPOP<sub>BFPB</sub> for Catalyzed Oxidation of TMB.**

Primarily, 0.1 mg of material is dispersed in 8 ml of ultrapure water. Then, H<sub>2</sub>O<sub>2</sub> (1mL, 400 mM), TMB (1mL, 1 mM) was joined into the above system. The final concentrations of H<sub>2</sub>O<sub>2</sub>, TMB, and FePPOP<sub>BFPB</sub> were 40 mM, 0.1 mM, and 10 µg·mL<sup>-1</sup>, respectively. The reaction of system was operated in the dark for 3 minutes at 25 °C. The supernatant was separated by centrifugating and monitored by measuring the



absorbance at 652 nm. The centrifuged solid catalyst was washed with water and reused without further process.

**S7. Calculation of the Kinetic Parameters of FePPOP<sub>BFPB</sub>.** The steady-state kinetic parameters for FePPOP<sub>BFPB</sub> were measured according to the previous reports.<sup>2</sup> Absorbance data were back-calculated to concentration by the Beer-Lambert Law using a molar absorption coefficient for TMB derived oxidation products ( $\epsilon_{652\text{ nm}}=39\text{ mM}^{-1}\text{ cm}^{-1}$ ). Apparent steady-state reaction rates at different concentrations of substrate were obtained by time-scanning curves with a UV-vis spectrophotometer at the wavelength of 652 nm. The initial velocities were fit with the substrate concentrations using typical Michaelis-Menten equation:

$$V = \frac{V_{\max}[S]}{K_m + [S]} \quad (\text{Eq. 7})$$

where [S] is the concentration of the substrate, V is the initial velocity,  $V_{\max}$  is the maximal velocity, and  $K_m$  is the Michaelis constant. Using Lineweaver-Burk equation, which was describe as  $1/V = (K_m/V_{\max})(1/[S]) + 1/V_{\max}$  (Eq. 8), double-reciprocal model derived from the Michaelis-Menten equation,  $K_m$  and  $V_{\max}$  of FePPOP<sub>BFPB</sub> with the substrate H<sub>2</sub>O<sub>2</sub> and TMB were obtained.

## Related Figures

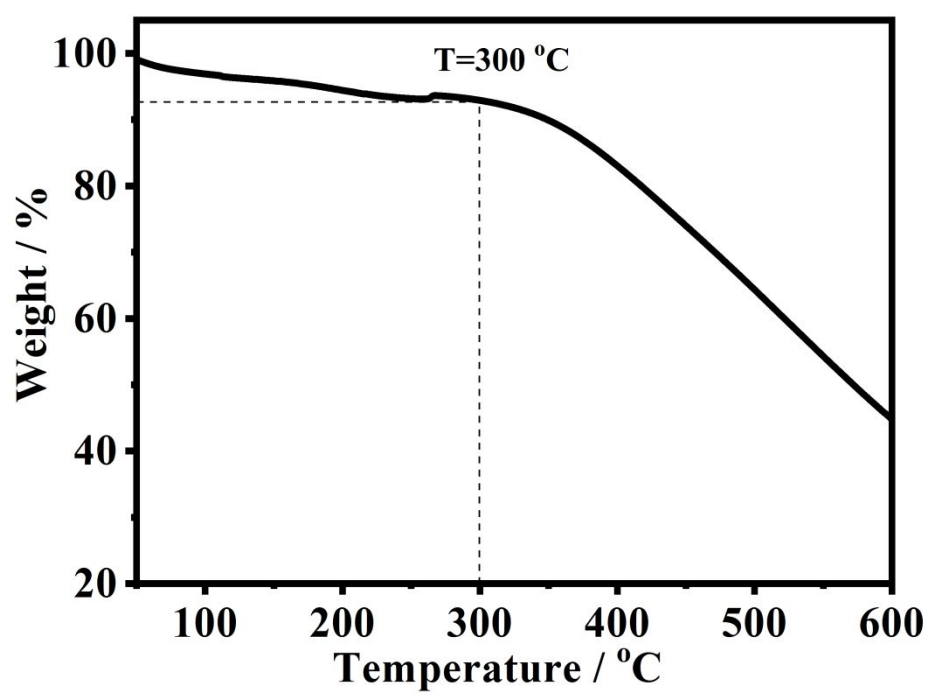

**Figure S3.** Thermogravimetric analysis (TGA) data of FePPOP<sub>BFPB</sub>.

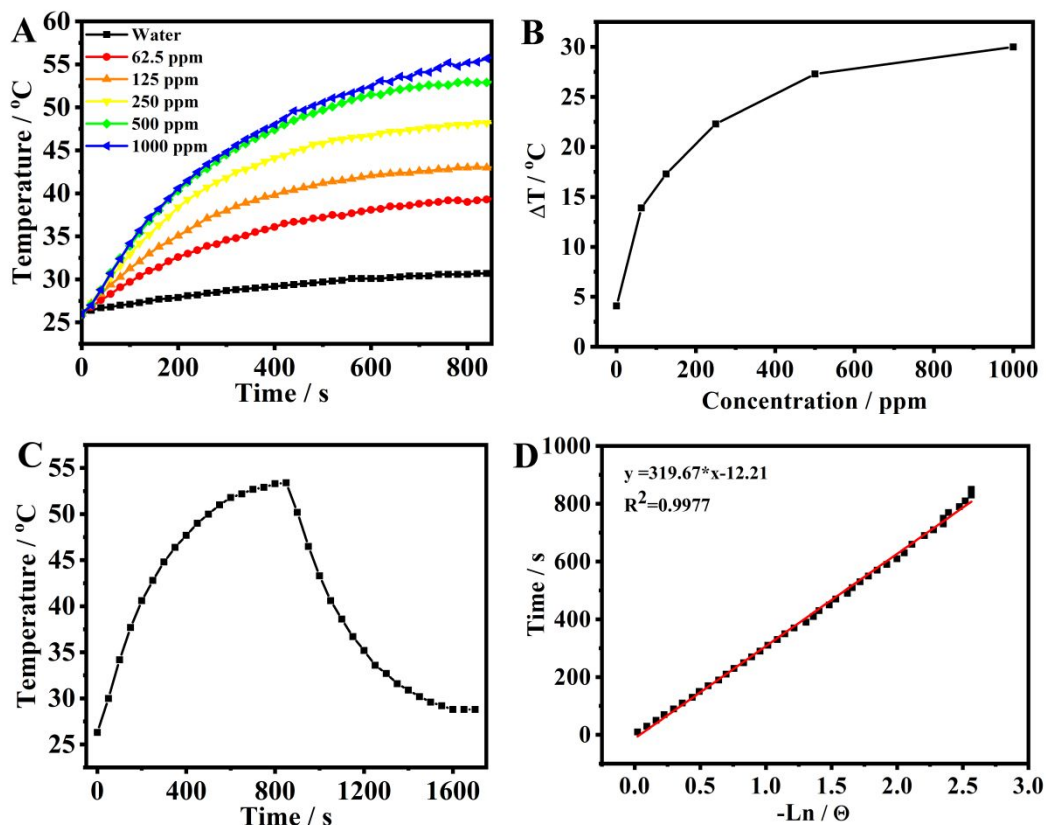

**Figure S4.** (A) Temperature changes based on the FePPOP<sub>BFPB</sub> concentration under 808 nm laser irradiation. (B) Temperature increment over a period of exposure to the 808 nm laser (1.2 W/cm<sup>2</sup>) at various FePPOP<sub>BFPB</sub> concentrations. (C) The photothermal effect of FePPOP<sub>BFPB</sub> aqueous solution under 808 nm NIR laser irradiation for 850 s and then turn off the NIR laser for 850 s. An 808 nm laser with a power density of 1.2 W/cm<sup>2</sup> was used. The concentration of FePPOP<sub>BFPB</sub> in water is 500 ppm (500 μg/mL). (D) The time constant ( $\tau_s$ ) for heat transfer from the system was calculated to be 319.67 s by applying the linear time data from the cooling period of (C) versus the negative natural logarithm of the driving force temperature. The concentration of FePPOP<sub>BFPB</sub> in water is 500 ppm (500 μg/mL).

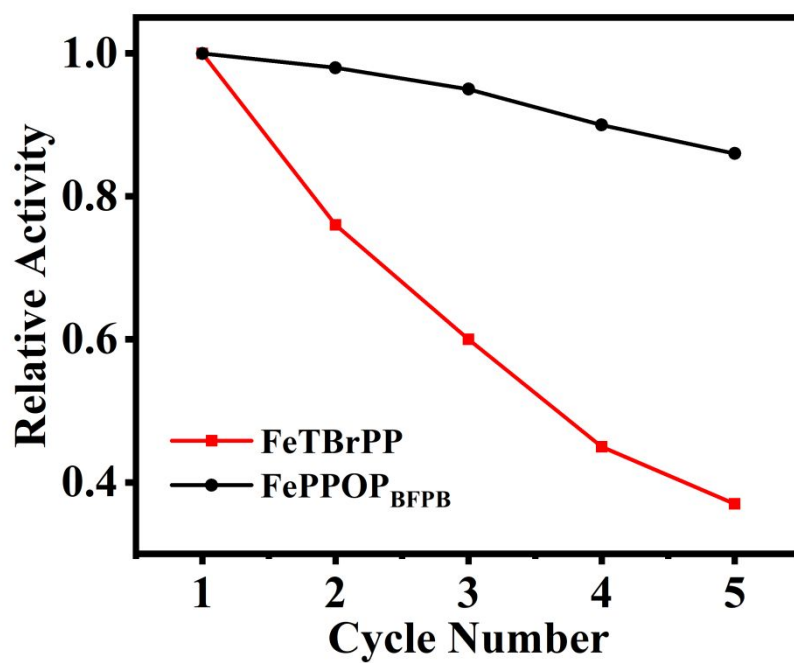

**Figure S5.** Recycled use of FePPOP<sub>BFPB</sub> and a normal iron porphyrin monomer [iron 5,10,15,20-tetrakis-(4'-bromoph-enyl)porphyrin, FeTBrPP] for catalyzed oxidation of TMB.

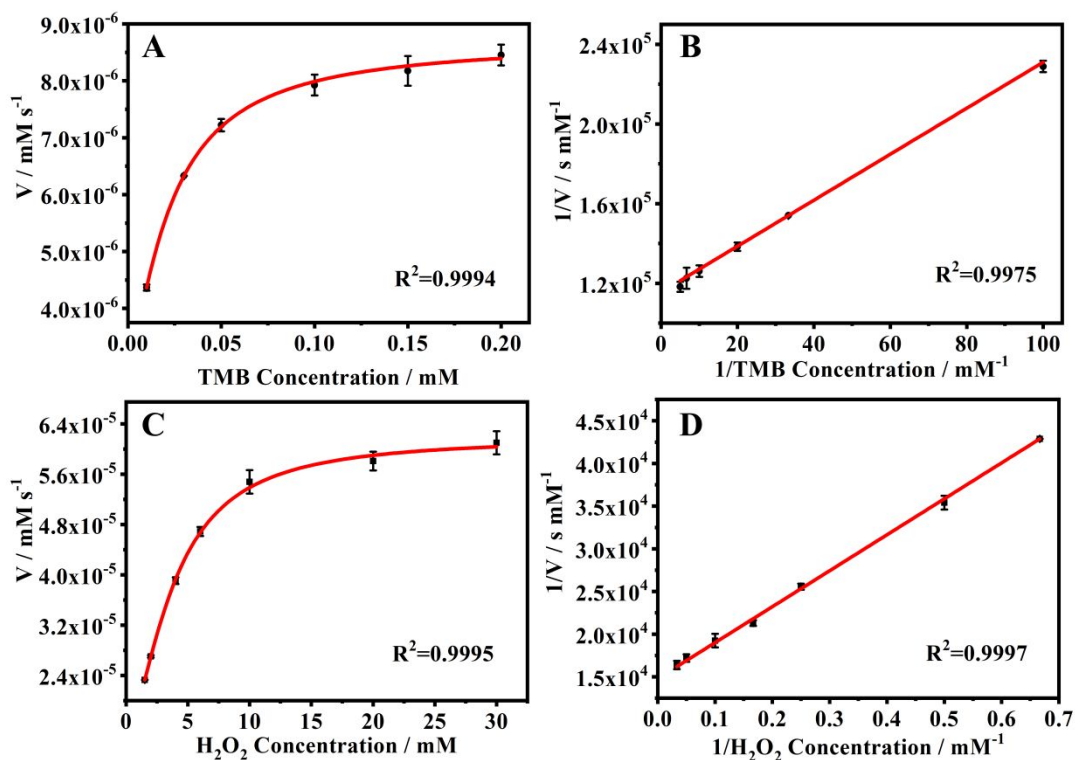

**Figure S6.** Steady-state kinetic assays of FePPOP<sub>BFPB</sub> using the Michaelis-Menten model (A, C) and the Lineweaver-Burk double-reciprocal model (B, D). The experiment was carried out in a reaction volume of 2 mL HAc-NaAc buffer solution (pH=3.8) in the presence of 10  $\mu\text{g} \cdot \text{mL}^{-1}$  of FePPOP<sub>BFPB</sub> at room temperature (25 °C). The concentration of  $\text{H}_2\text{O}_2$  was fixed at 40 mM with various concentrations of TMB (A and B). The concentration of TMB was fixed at 0.1 mM with various concentrations of  $\text{H}_2\text{O}_2$  substrate (C and D).

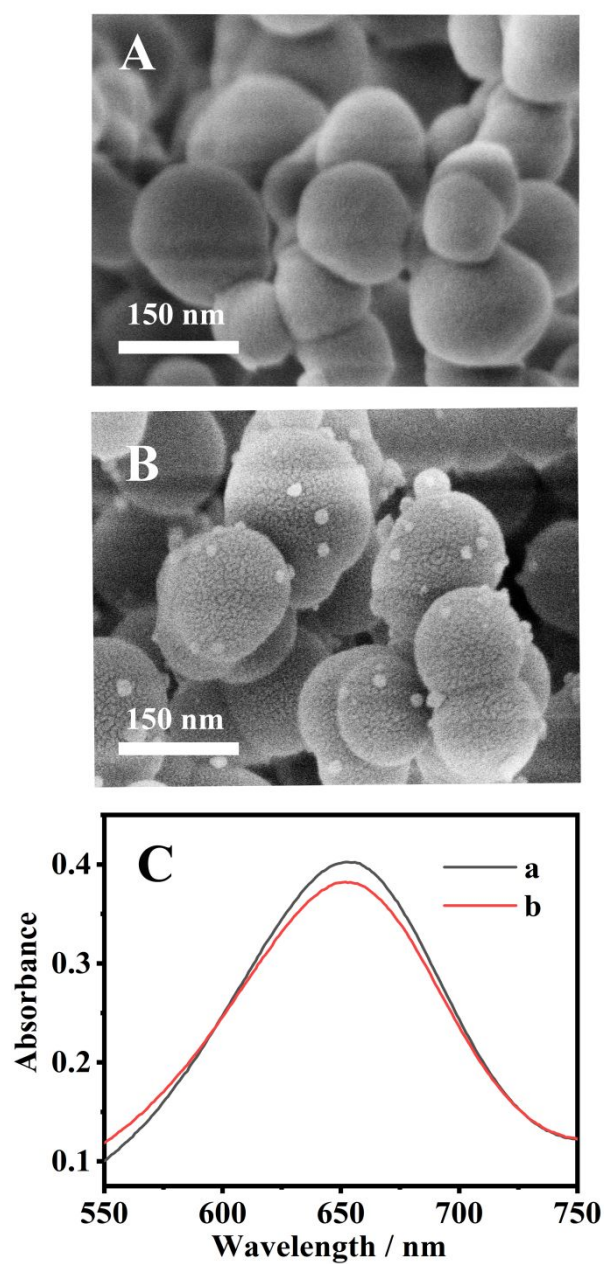

**Figure S7.** Comparison of the morphology characterization of (A) FePPOP<sub>BFPB</sub> and (B) Au@ FePPOP<sub>BFPB</sub>. (C) Comparison of the catalytic activity of (a) FePPOP<sub>BFPB</sub> and (b) Au@ FePPOP<sub>BFPB</sub>.

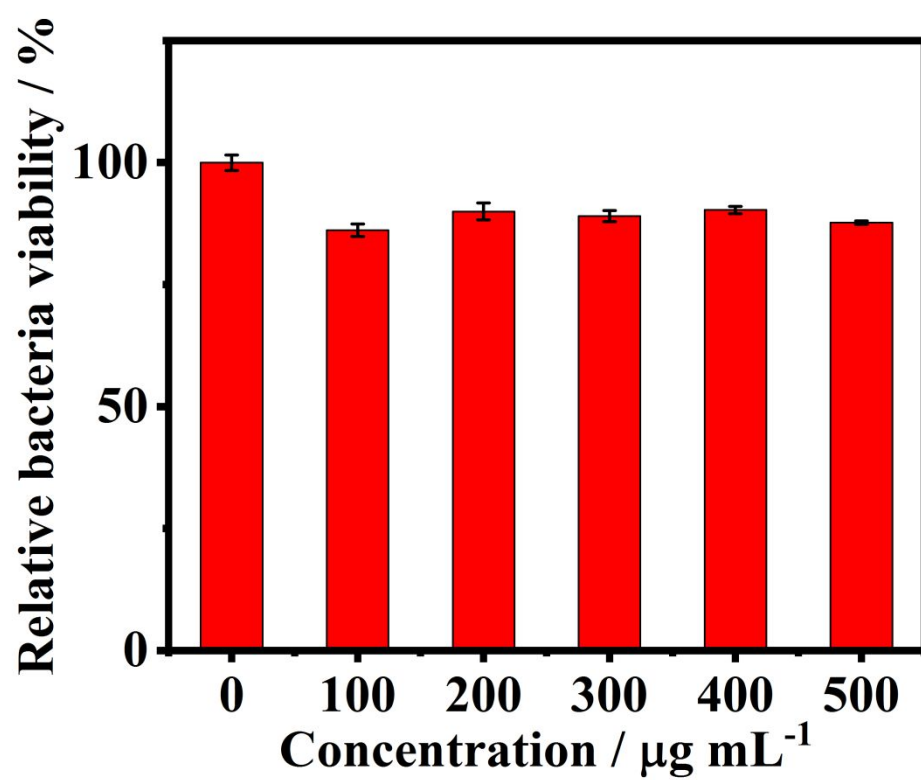

**Figure S8.** Cytotoxicity studies of the FePPOP<sub>BFPB</sub> on *S. aureus*.

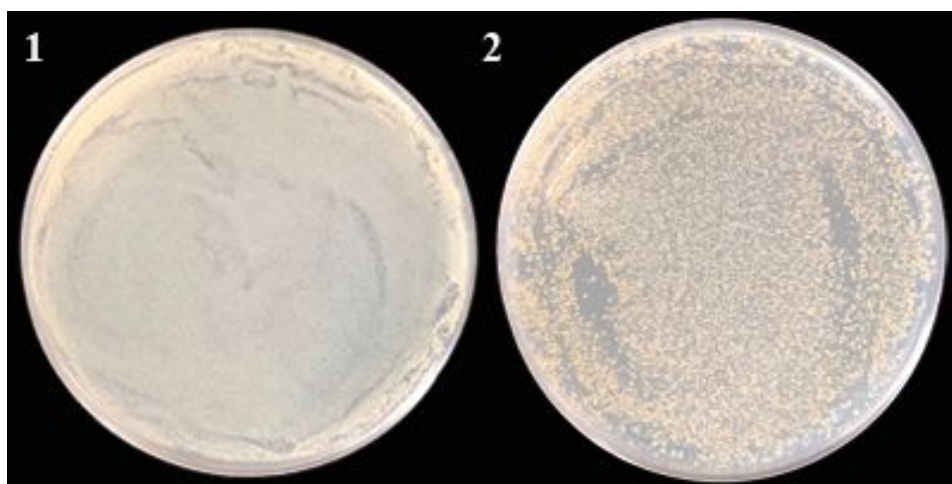

**Figure S9.** The photos of two plates seeded with  $10^5$  CFU/mL of *S. aureus* incubated in PBS at (1) 37 °C and (2) 52.5 °C for 20 min and cultured at 37 °C for 12 h.



**Table S1.** Comparison of the kinetic parameters of FePPOP<sub>BFPB</sub> with other catalysts.  $K_m$  is the Michaelis constant and  $V_{max}$  is the maximal reaction velocity.

| Catalyst                          | $K_m$ (mM) |                               | $V_{max}$ (mM/s)      |                               | Reference  |
|-----------------------------------|------------|-------------------------------|-----------------------|-------------------------------|------------|
|                                   | TMB        | H <sub>2</sub> O <sub>2</sub> | TMB                   | H <sub>2</sub> O <sub>2</sub> |            |
| FePPOP <sub>BFPB</sub>            | 0.0099     | 2.81                          | $8.62 \times 10^{-6}$ | $6.70 \times 10^{-5}$         | This study |
| HRP                               | 0.43       | 1.21                          | $1.87 \times 10^{-5}$ | $5.88 \times 10^{-5}$         | 3          |
| FePor-TFPA-COP                    | 0.027      | 2.77                          | $1.76 \times 10^{-5}$ | $8.33 \times 10^{-4}$         | 3          |
| GO-Fe <sub>3</sub> O <sub>4</sub> | 0.71       | 0.43                          | $5.31 \times 10^{-5}$ | $1.31 \times 10^{-4}$         | 4          |
| Hemin                             | 4.84       | 2.74                          | $4.69 \times 10^{-5}$ | $3.53 \times 10^{-5}$         | 5          |
| H <sub>2</sub> TCPP-ZnS           | 5.486      | 17.24                         | $4.8 \times 10^{-5}$  | $1.0 \times 10^{-4}$          | 6          |

**Table S2.** Comparison of the current approach and relevant methods for analysis of pathogenic bacteria.

| target bacteria               | detection method | LOD<br>(CFU/mL)     | Reference  |
|-------------------------------|------------------|---------------------|------------|
| <i>Listeria monocytogenes</i> | PCR              | 30                  | 7          |
| <i>S. aureus</i>              | FCM              | 33                  | 8          |
| <i>S. aureus</i>              | FCM              | 10 <sup>2</sup>     | 9          |
| <i>S. aureus</i>              | CM               | 1.5×10 <sup>3</sup> | 10         |
| <i>S. aureus</i>              | CM               | 4×10 <sup>3</sup>   | 11         |
| <i>S. aureus</i>              | FLS              | 2.9×10 <sup>2</sup> | 12         |
| <i>S. aureus</i>              | ELISA            | 24                  | This study |

## Reference

- (1) Shu, J.; Qiu, Z.; Zhuang, J.; Xu, M.; Tan, D. In Situ Generation of Electron Donor to Assist Signal Amplification on Porphyrin-Sensitized Titanium Dioxide Nanostructures for Ultrasensitive Photoelectrochemical Immunoassay. *ACS Appl. Mater. Interfaces* **2015**, 7, 23812-23818.
- (2) Zhang, X.; Gong, S.; Zhang, Y.; Yang, T.; Wang, C.; Gu, N. Prussian Blue Modified Iron Oxide Magnetic Nanoparticles and their High Peroxidase-Like Activity. *J. Mater. Chem.* **2010**, 20, 5110.
- (3) Deng, X.; Fang, Y.; Lin, S.; Cheng, Q.; Liu, Q.; Zhang, X. Porphyrin-Based Porous Organic Frameworks as a Biomimetic Catalyst for Highly Efficient Colorimetric Immunoassay. *ACS Appl. Mater. Interfaces* **2017**, 9, 3514-3523.
- (4) Dong, Y. L.; Zhang, H. G.; Rahman, Z. U.; Su, L.; Chen, X. J.; Hu, J.; Chen, X. G. Graphene Oxide-Fe<sub>3</sub>O<sub>4</sub> Magnetic Nanocomposites with Peroxidase-Like Activity for Colorimetric Detection of Glucose. *Nanoscale* **2012**, 4, 3969-76.
- (5) Guo, Y. J.; Deng, L.; Li, J.; Guo, S. J.; Wang, E. K.; Dong, S. J. Hemin-Graphene Hybrid Nanosheets with Intrinsic Peroxidase-Like Activity for Label-Free Colorimetric Detection of Single-Nucleotide Polymorphism. *ACS Nano* **2011**, 5, 1282-1290.
- (6) Liu, Q.; Chen, P.; Xu, Z.; Chen, M.; Ding, Y.; Yue, K.; Xu, J. A Facile Strategy to Prepare Porphyrin Functionalized ZnS Nanoparticles and their Peroxidase-Like Catalytic Activity for Colorimetric Sensor of Hydrogen Peroxide and Glucose. *Sensors and Actuators B: Chemical* **2017**, 251, 339-348.

- (7) Meng, X.; Li, F.; Li, F.; Xiong, Y.; Xu, H. Vancomycin Modified Pegylated-Magnetic Nanoparticles Combined with PCR for Efficient Enrichment and Detection of *Listeria Monocytogenes*. *Sensors and Actuators B: Chemical* **2017**, *247*, 546-555.
- (8) Meng, X.; Yang, G.; Li, F.; Liang, T.; Lai, W.; Xu, H. Sensitive Detection of *Staphylococcus aureus* with Vancomycin-Conjugated Magnetic Beads as Enrichment Carriers Combined with Flow Cytometry. *ACS Appl. Mater. Interfaces* **2017**, *9*, 21464-21472.
- (9) Shylaja, R.; Bhairab, M.; Padma, S.; Bhavanashri, N.; Joseph, K. Capture and Detection of *Staphylococcus aureus* with Dual Labeled Aptamers to Cell Surface Components. *International Journal of Food Microbiology* **2018**, *265*, 74-83.
- (10) Sung, Y. J.; Suk, H. J.; Sung, H. Y.; Li, T.; Poo, H.; Kim, M. G. Novel Antibody/Gold Nanoparticle/Magnetic Nanoparticle Nanocomposites for Immunomagnetic Separation and Rapid Colorimetric Detection of *Staphylococcus aureus* in Milk. *Biosens. Bioelectron.* **2013**, *43*, 432-439.
- (11) Yu, J.; Zhang, Y.; Zhang, Y.; Li, H.; Yang, H.; Wei, H. Sensitive and Rapid Detection of *Staphylococcus aureus* in Milk via Cell Binding Domain of Lysin. *Biosens. Bioelectron.* **2016**, *77*, 366-371.
- (12) Kong, W.; Xiong, J.; Yue, H.; Fu, Z., Sandwich Fluorimetric Method for Specific Detection of *S. aureus* Based on Antibiotic-Affinity Strategy. *Anal. Chem.* **2015**, *87*, 9864-9868.
